# Supplementary material for: SARS-CoV-2 shifts transcription of host gene to increase Spike acylation and boost infectivity
Source: Research Square preprint supplement (doi:10.21203/rs.3.rs-2860422/v1), 2023-05-15
Supplement: Supplementary file 1 [file 0e847f45f7b480e754bd0487.docx]

Supplementary Information

Table S1.

**Table S1 – Summary of 5’RACE analysis –** with: positions of 5 ' ends determined by 5'RACE sequencing the number of clones retrieved for each end, the position of each 5’end in relation to the annotated human start site (Human version hg19- http://genome.ucsc.edu), the coverage or whether the sequence can be detected by the primers shown in Extended data Fig. 1D, and the percentages of clones determined for different coverage-groups depicted in **Extended data Fig. 1d.**

**Movie S1.**

Time-lapse confocal microscopy (7 frames per second) of Vero E6 cells co-expressing (24 h) the Golgi marker Scarlet-Giantin, ZDHHC20Long-RUSH-GFP reporter and an ER-resident hook. Synchronized trafficking was monitored upon D-biotin addition, after T0 (see also Fig 4l and Extended data Fig 4f). Scale bar 10 μm.

Movie S2.

Time-lapse confocal microscopy (7 frames per second) of Vero E6 cells co-expressing (24 h) the Golgi marker Scarlet-Giantin, ZDHHC20short-RUSH-GFP reporter and an ER-resident hook. Synchronized trafficking was monitored upon D-biotin addition after T0 (see also Fig 4l and Extended data Fig 4f). Scale bar 10 μm.
